# Supplementary material for: Potential Contributors to Increased Pulmonary Embolism Hospitalizations During the COVID-19 Pandemic: Insights From the German-Wide Helios Hospital Network
Source: PubMed Central journal article supplement (PMC8387932; doi:10.3389/fcvm.2021.715761), 2021-08-12

**Supplementary Table 1.** Total case number and demographics of inpatient cases between May 6 and December 15.

| <b>Year</b> | <b>Number of cases</b> | <b>Age (mean <math>\pm</math> SD)</b> | <b>Age (Median [IQR])</b> | <b>Females (%)</b> |
|-------------|------------------------|---------------------------------------|---------------------------|--------------------|
| 2016        | 730,881                | 55.6 $\pm$ 25.4                       | 62 [38, 76]               | 52                 |
| 2017        | 734,302                | 56.0 $\pm$ 25.3                       | 62 [39, 77]               | 52                 |
| 2018        | 726,545                | 56.2 $\pm$ 25.4                       | 62 [39, 77]               | 52                 |
| 2019        | 732,497                | 56.7 $\pm$ 25.2                       | 63 [40, 77]               | 51                 |
| 2020        | 657,296                | 57.5 $\pm$ 24.9                       | 63 [42, 78]               | 51                 |

**Supplementary Table 2.** Total and daily admissions with pulmonary embolism between May 6 and December 15.

| <b>Year</b> | <b>Total admissions</b> | <b>Daily admissions</b> | <b>CRR (95% CI)</b> | <b>P value</b> |
|-------------|-------------------------|-------------------------|---------------------|----------------|
| 2020        | 2,404                   | 10.7                    |                     |                |
| 2019        | 2,202                   | 9.8                     | 0.92 (0.86 – 0.97)  | < 0.01         |
| 2018        | 2,112                   | 9.4                     | 0.88 (0.83 – 0.93)  | < 0.01         |
| 2017        | 2,236                   | 10.0                    | 0.93 (0.88 – 0.99)  | 0.01           |
| 2016        | 2,167                   | 9.7                     | 0.90 (0.85 – 0.96)  | < 0.01         |

**Supplementary Figure 1.** Total weekly hospital admissions for pulmonary embolism, non-Covid-19 pneumonia, computed tomography pulmonary angiography, volume depletion and new SARS-CoV-2 infections in Germany (from top to bottom). Smooth curves for weekly admission rates were fitted via Locally Weighted Scatterplot Smoothing (LOESS) with a degree of smoothing of  $\alpha = 0.2$ .

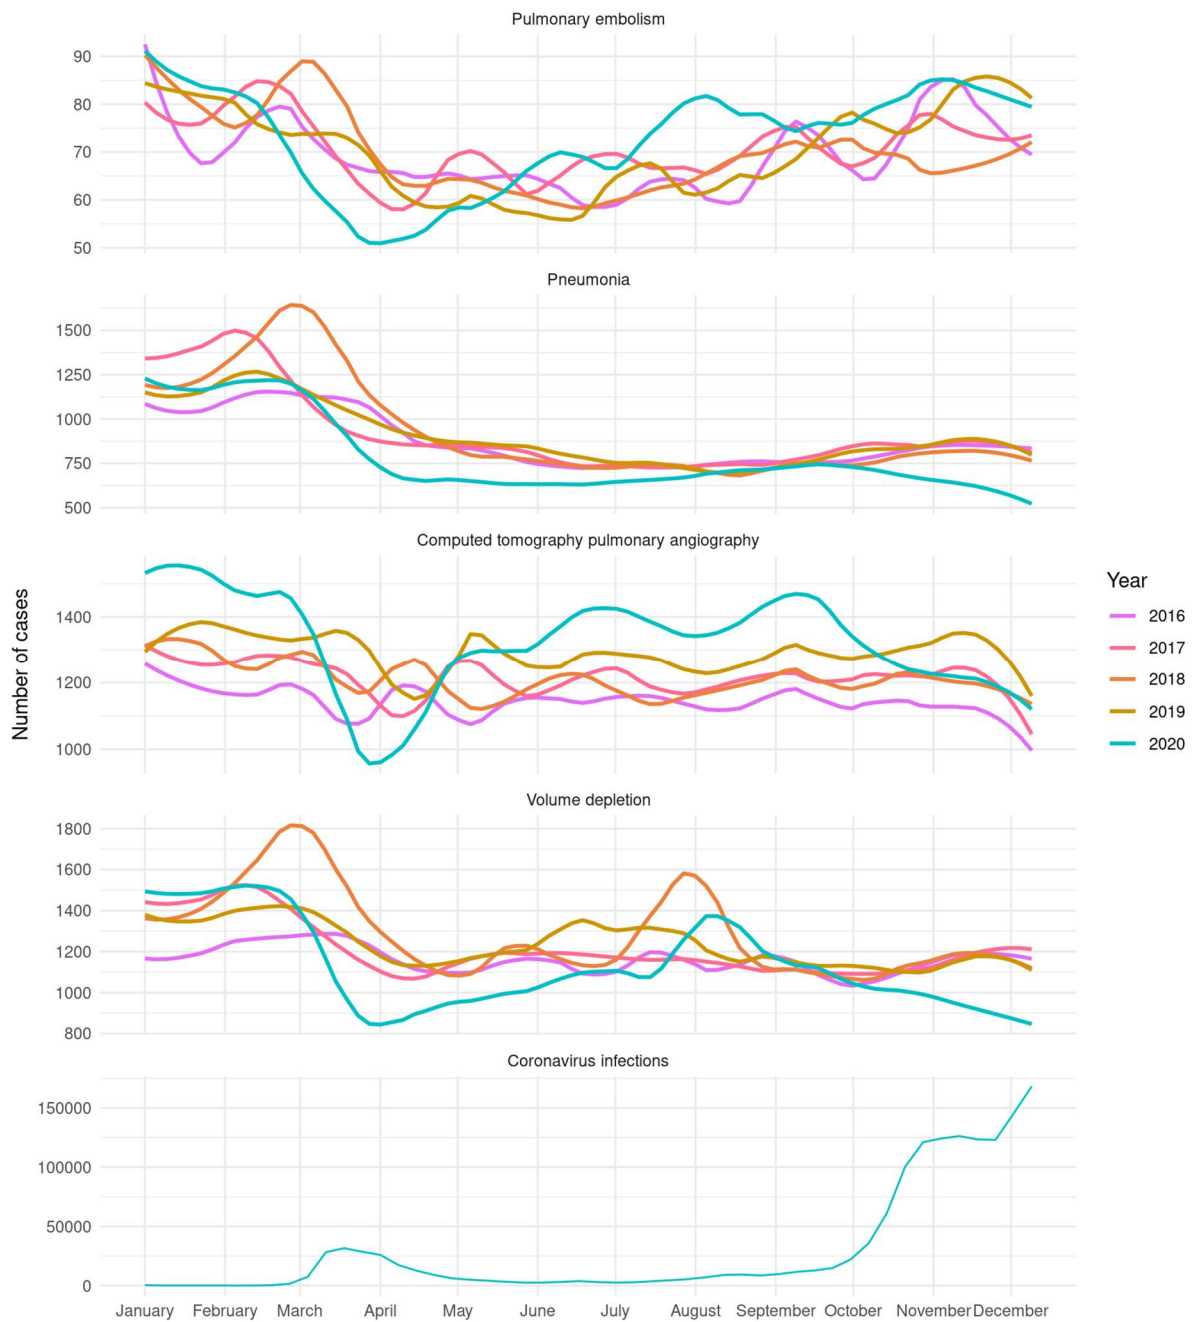

Supplement: Data_Sheet_1.pdf [file Data_Sheet_1.pdf]
